# Supplementary material
Source: PubMed Central journal article supplement (PMC1691543)
Supplement: 14728784s01.pdf [file 14728784s01.pdf]

This is an electronic appendix to the paper by Atkinson *et al.* 2003 Protists decrease in size linearly with temperature: *ca.* 2.5% °C<sup>-1</sup>. *Proc. R. Soc. Lond. B* **270**, 2605–2611. (DOI 10.1098/rspb.2003.2538.)

Electronic appendices are refereed with the text. However, no attempt is made to impose a uniform editorial style on the electronic appendices.

#### Electronic appendix A

1. Data on rates of cell division were converted to natural logarithm-based specific growth rates (d<sup>-1</sup>).
2. A single outlying datum (*Rhizamoeba* sp. at 5°C, Butler & Rogerson 1996) was removed from the analysis, as its deviation from the cell volume at 15°C, expressed as a fraction of the cell volume at 15°C (Fig. 2a) was 2.5 times greater than that of the point with the next largest value (co-ordinate: 2.5, -10, not included in Fig. 2).
3. To test for biases due to differing sizes of dataset, we compared results derived from unweighted data (see paper) with those in which the relative thermal sensitivity of cell volume ( $a/V_{15}$ ) was weighted for each dataset by the number of points used to calculate the regression coefficient. The weighting factor = (number of datasets \* number of values in dataset)/total number of values from all datasets combined. As indicated in the paper, weighting made little difference to the estimates of mean relative thermal sensitivity of cell volume ( $a/V_{15}$ ).
4. The weighted mean ( $\pm$ se) relative thermal sensitivity of cell volume for the 65 datasets containing the 427 data points was  $-0.026^{\circ}\text{C}^{-1}$  ( $\pm$  0.003). Inclusion of the outlier mentioned in 2, above, changed the weighted mean ( $\pm$ se) to  $-0.027^{\circ}\text{C}^{-1}$  ( $\pm$  0.004). In either case, the relationship did not deviate from linearity ( $p > 0.4$ ).
5. Since there was rarely sufficient information to distinguish mixotrophs from other modes of nutrition (autotrophy, heterotrophy), ‘trophy’ was assigned according to the energy source provided in the experiment. Thus, an organism that may have been capable of mixotrophy in nature was coded as a heterotroph if it was cultured on an organic energy source.
6. Salinities indicated in the experiments were assigned to categories, thus: 0‰ – freshwater; 12 - 28‰ - brackish; 34 - 35‰ – marine.
7. **Table 1** below lists the datasets used in this study, and individual relationships between cell volume and temperature, ( $V_{15}$  is cell volume at 15°C, estimated from fitted linear regression equation; asterisk indicates estimate derived by extrapolation and therefore not used in meta-analysis; otherwise, estimates are from interpolations). Probability values are only given for significant ( $p < 0.05$ ) regressions.

**Table 1**

| Species                                                | Ref                        | CV <sub>15</sub> | Regression coefficient / CV <sub>15</sub> | Number of points | Sig. of regression p |
|--------------------------------------------------------|----------------------------|------------------|-------------------------------------------|------------------|----------------------|
| AMOEBAE:                                               |                            |                  |                                           |                  |                      |
| <i>Clydonella rosenfieldi</i>                          | Butler & Rogerson 1996     | 410              | -0.0539                                   | 4                |                      |
| <i>Dactylamoeba</i> sp.                                | Butler & Rogerson 1996     | 2592             | -0.06070                                  | 3                |                      |
| <i>Paraflabellula reniformis</i>                       | Butler & Rogerson 1996     | 453              | 0.00199                                   | 4                |                      |
| <i>Platyamoeba</i> sp.                                 | Butler & Rogerson 1996     | 32               | -0.056                                    | 3                |                      |
| <i>Rhizamoeba</i> sp.                                  | Butler & Rogerson 1996     | 123              | -0.184                                    | 4                |                      |
| <i>Stereomyxa ramosa</i>                               | Butler & Rogerson 1996     | 664              | 0.00166                                   | 3                |                      |
| <i>Vahlkampfia baltica</i>                             | Butler & Rogerson 1996     | 334              | -0.0523                                   | 4                |                      |
| <i>Vannella caledonica</i>                             | Butler & Rogerson 1996     | 364              | -0.0414                                   | 4                | 0.0078               |
| <i>Vannella</i> sp.                                    | Butler & Rogerson 1996     | 40               | -0.010                                    | 4                |                      |
| <i>Acanthamoeba polyphaga</i> Puschkarew               | Baldock <i>et al.</i> 1980 | 1230             | 0.000815                                  | 3                |                      |
| <i>Cochliopodium minus</i> Page                        | Baldock <i>et al.</i> 1980 | 3450             | -0.0233                                   | 4                |                      |
| <i>Glaeseria mira</i> Glässer                          | Baldock <i>et al.</i> 1980 | 396              | 0.0211                                    | 4                |                      |
| <i>Saccamoeba limax</i> Page                           | Baldock <i>et al.</i> 1980 | 5970             | -0.0131                                   | 3                |                      |
| <i>Vannella</i> sp.                                    | Baldock <i>et al.</i> 1980 | 7840             | 0.00329                                   | 4                |                      |
| <i>Vexillifera bacillipedes</i> Page                   | Baldock <i>et al.</i> 1980 | 263              | 0.0211                                    | 3                |                      |
| CILIATES:                                              |                            |                  |                                           |                  |                      |
| <i>Vorticella microstoma</i> Ehrenberg                 | Finlay 1977                | 21335            | -0.019919                                 | 3                |                      |
| <i>Cyclidium glaucoma</i> Müller                       | Finlay 1977                | 2430             | -0.009953                                 | 3                |                      |
| <i>Tetrahymena pyriformis</i> Ehrenberg                | Finlay 1977                | 8524             | -0.01764                                  | 3                |                      |
| <i>Chilodonella uncinata</i> Ehrenberg                 | Finlay 1977                | 6200             | 0.01064                                   | 3                |                      |
| <i>Colpidium campylum</i> Stokes                       | Finlay 1977                | 48700            | -0.038472                                 | 3                |                      |
| <i>Loxocephalus plagiatus</i> Stokes                   | Finlay 1977                | 32766            | -0.019154                                 | 3                |                      |
| <i>Paramecium aurelia</i> Ehrenberg                    | Finlay 1977                | 236205           | 0.0293266                                 | 3                |                      |
| <i>Paramecium bursaria</i> Ehrenberg                   | Finlay 1977                | 213705           | -0.0413323                                | 3                |                      |
| <i>Stentor polymorphus</i> Müller                      | Finlay 1977                | 1893000          | 0.04927                                   | 3                |                      |
| <i>Spirostomum teres</i> Claparede and Lachmann        | Finlay 1977                | 215476           | 0.002                                     | 3                |                      |
| <i>Euplotes balteatus</i> (Dujardin)                   | Lee & Fenchel 1972         | 16100            | -0.0163                                   | 4                |                      |
| <i>Strombidinopsis multiauris</i>                      | Montagnes & Lessard 1999   | 166565           | -0.0448429                                | 6                | 0.0431               |
| <i>Urotricha farcata</i> (Lake Schöhsee)               | Weisse & Montagnes 1998    | 2313.35          | -0.0339389                                | 15               | <0.0001              |
| <i>Urotricha furcata</i> (mixed clone, Lake Schöhsee)  | Weisse & Montagnes 1998    | 976.10           | -0.016246                                 | 11               | 0.0004               |
| <i>Urotricha furcata</i> (mixed clone, Lake Constance) | Weisse & Montagnes 1998    | 1533.25          | -0.0622546                                | 8                | 0.001                |
| <i>Urotricha furcata</i> (clone A, Lake Constance)     | Weisse & Montagnes 1998    | 1821.35          | -0.0391547                                | 8                | 0.0005               |
| <i>Urotricha furcata</i> (clone B, Lake Constance)     | Weisse & Montagnes 1998    | 1428.85          | -0.0277248                                | 12               | 0.0001               |
| <i>Urotricha furcata</i> (clone C, Lake Constance)     | Weisse & Montagnes 1998    | 1519.00          | -0.0317290                                | 12               | 0.0001               |
| <i>Tetrahymena pyriformis</i> (HS)                     | James & Read 1957          | 14373            | -0.023916                                 | 3                |                      |
| DIATOMS:                                               |                            |                  |                                           |                  |                      |
| <i>Plagiotropis</i> sp.                                | Mühlig - Hofmann (unpubl.) | 1688.25          | -0.0106920                                | 22               |                      |
| <i>Cylindrotheca closterium</i>                        | Mühlig - Hofmann (unpubl.) | 247.85           | -0.017015                                 | 25               | 0.0099               |
| <i>Skeletonema costatum</i> (Grev.) Cl.                | Jørgensen 1968             | 169              | -0.0435                                   | 4                | 0.0207               |
| <i>Phaeodactylum tricornerutum</i> Bohlin              | Morris & Glover 1974       | 330              | -0.0556                                   | 3                |                      |
| <i>Nitzschia closterium</i> (Ehrenberg)                | Morris & Glover 1974       | 906              | -0.108                                    | 2                |                      |
| <i>Cylindrotheca closterium</i>                        | Waring (unpubl.)           | 227.0            | -0.05972                                  | 17               | <0.0001              |
| <i>Achnanthes</i> sp.                                  | Waring (unpubl.)           | 354.6            | -0.03302                                  | 17               | <0.0001              |
| <i>Phaeodactylum tricornerutum</i>                     | Montagnes & Franklin 2001  | 77               | -0.021                                    | 15               | 0.0172               |
| <i>Ditylum brightwellii</i>                            | Montagnes & Franklin 2001  | 17440            | -0.082229                                 | 12               | 0.0003               |
| <i>Skeletonema costatum</i>                            | Montagnes & Franklin 2001  | 218              | 0.0275                                    | 12               |                      |

| Species                                                    | Ref                         | CV <sub>15</sub> | Regression coefficient / CV <sub>15</sub> | Number of points | Sig. of regression p |
|------------------------------------------------------------|-----------------------------|------------------|-------------------------------------------|------------------|----------------------|
| <i>Thalassiosira weissflogii</i>                           | Montagnes & Franklin 2001   | 1362*            | -0.1709*                                  | 6                |                      |
| <i>Chaetoceros simplex</i> var. <i>calcitrans</i>          | Montagnes & Franklin 2001   | 166              | -0.0113                                   | 12               |                      |
| <i>Cyclotella cryptica</i>                                 | Montagnes & Franklin 2001   | 728              | -0.0177                                   | 15               | <0.0001              |
| <i>Coscinodiscus</i> sp.                                   | Montagnes & Franklin 2001   | 1700000          | 0.0221                                    | 9                |                      |
| <i>Chaetoceros</i> sp.                                     | Lomas & Glibert 1999        | 67               | 0.017                                     | 3                |                      |
| <i>Thalassiosira weissflogii</i> (Grunow) Fryxell et Hasle | Lomas & Glibert 1999        | 1533             | -0.01925                                  | 2                |                      |
| <i>Phaeodactylum tricornutum</i> Bohlin                    | Kudo <i>et al.</i> 2000     | 137              | 0.0125                                    | 2                |                      |
| <i>Phaeodactylum tricornutum</i> Bohlin                    | Thompson <i>et al.</i> 1992 | 42               | 0.0704                                    | 4                | <0.05                |
| <i>Chaetoceros calcitrans</i>                              | Thompson <i>et al.</i> 1992 | 40               | 0.0109                                    | 4                |                      |
| <i>Thalassiosira pseudonana</i>                            | Thompson <i>et al.</i> 1992 | 48               | 0.0289                                    | 4                |                      |
| <i>Chaetoceros simplex</i>                                 | Thompson <i>et al.</i> 1992 | 59               | 0.0282                                    | 4                |                      |
| DINOFLAGELLATES:                                           |                             |                  |                                           |                  |                      |
| <i>Alexandrium ostenfeldii</i>                             | Jensen & Moestrup 1997      | 22450            | -0.070367                                 | 6                | 0.0003               |
| <i>Gonyaulax tamarensis</i> Lebour                         | Watras & Chisholm 1982      | 9610             | -0.0347                                   | 25               | <0.0001              |
| <i>Gonyaulax polyedra</i> Stein                            | Meeson & Sweeney 1982       | 57000            | -0.056                                    | 2                |                      |
| <i>Ceratium furca</i>                                      | Meeson & Sweeney 1982       | 93000            | -0.037                                    | 2                |                      |
| <i>Prorocentrum minimum</i> (Pavillard) Schiller           | Lomas & Glibert 1999        | 1468             | -0.06397                                  | 3                |                      |
| <i>Gyrodinium uncatenum</i> Hulburt                        | Lomas & Glibert 1999        | 17944            | -0.038698                                 | 2                |                      |
| <i>Heterocapsa triquetra</i>                               | Aelion & Chisholm 1985      | 1572             | -0.02867                                  | 5                | 0.0105               |
| <i>Thoracosphaera heimii</i> (Lohmann)                     | Karwath <i>et al.</i> 2000  | 1646.4*          | 0.011151*                                 | 7                |                      |
| <i>Gymnodinium galatheanum</i> Braarud                     | Nielsen 1996                | 982              | -0.0257                                   | 4                |                      |
| FLAGELLATES:                                               |                             |                  |                                           |                  |                      |
| <i>Dunaliella tertiolecta</i>                              | Eppley & Sloan 1966         | 363              | -0.0446                                   | 6                | 0.002                |
| <i>Dunaliella tertiolecta</i> Butcher                      | Morris & Glover 1974        | 391              | -0.0801                                   | 3                |                      |
| <i>Rhodomonas salina</i>                                   | Montagnes & Franklin 2001   | 353              | -0.000651                                 | 9                |                      |
| <i>Isochrysis galbana</i>                                  | Montagnes & Franklin 2001   | 98               | -0.053                                    | 12               | 0.0017               |
| <i>Paraphysomonas imperforata</i> (Arctic)                 | Choi & Peters 1992          | 258              | -0.00705                                  | 3                |                      |
| <i>Paraphysomonas imperforata</i> (Newfoundland)           | Choi & Peters 1992          | 184              | -0.0126                                   | 3                |                      |
| <i>Pavlova lutheri</i>                                     | Thompson <i>et al.</i> 1992 | 38               | 0.0214                                    | 4                |                      |
| <i>Dunaliella tertiolecta</i>                              | Thompson <i>et al.</i> 1992 | 204              | -0.0060                                   | 4                |                      |
| <i>Isochrysis galbana</i>                                  | Thompson <i>et al.</i> 1992 | 41               | 0.0080                                    | 4                |                      |
| <i>Dunaliella tertiolecta</i> Butcher                      | Sosik & Mitchell 1994       | 185              | -0.0111                                   | 8                |                      |

## REFERENCES

- Aelion, C. M. & Chisholm, S. W. 1985 Effect of temperature on growth and ingestion rates of *Favella* sp.. *J. Plankton Res.* **7**, 821–831.
- Baldock, B. M., Baker, J. H., Sleigh, M. A. 1980 Laboratory growth rates of six species of freshwater *Gymnamoebia*. *Oecologia* **47**, 156–159.
- Butler, H. & Rogerson, A. 1996 Growth potential, production efficiency and annual production of marine benthic naked amoebae (gymnamoebae) inhabiting sediments of the Clyde Sea area, Scotland. *Aquat. Microb. Ecol.* **10**, 123–129.
- Choi, J. W. & Peters, F. 1992 Effects of temperature on two psychrophilic ecotypes of a heterotrophic nanoflagellate, *Paraphysomonas imperforata*. *Appl. Environ. Microbiol.* **58**, 593–599.
- Eppley, R. W. & Sloan, P. R. 1966 Growth rates of marine phytoplankton: correlation with light absorption by cell chlorophyll *a*. *Physiol. Plant* **19**, 47–59.
- Finlay, B. J. 1977 The dependence of reproductive rate on cell size and temperature in freshwater ciliated protozoa. *Oecologia* **30**, 75–81.

- James, T. W. & Read, C. P. 1957 The effect of incubation temperature on the cell size of *Tetrahymena pyriformis*. *Exp. Cell. Res.* **13**, 510–516.
- Jensen, M. Ø. & Moestrup, Ø. 1997 Autecology of the toxic dinoflagellate *Alexandrium ostenfeldii*: life history and growth at different temperatures and salinities. *Eur. J. Phycol.* **32**, 9–18.
- Jørgensen, E. G. 1968 The adaptation of plankton algae II. Aspects of the temperature adaptation of *Skeletonema costatum*. *Physiol. Plant.* **21**, 423–427.
- Karwath, B., Janofske, D., Tietjen, F., Willems, H. 2000 Temperature effects on growth and cell size in the marine calcareous dinoflagellate *Thoracospaera heimii*. *Mar. Micropal.* **39**, 43–51.
- Kudo, I., Miyamoto, M., Noiri, Y., Maita, Y. 2000 Combined effects of temperature and iron on the growth and physiology of the marine diatom *Phaeodactylum tricorutum* (Bacillariophyceae). *J. Phycol.* **36**, 1096–1102.
- Lee, C. C. & Fenchel, T. 1972 Studies on ciliates associated with sea ice from Antarctica II. Temperature responses and tolerances in ciliates from Antarctic, temperate and tropical habitats. *Arch. Protistenk. Bd.* **114**, 237–244.
- Lomas, M. W. & Glibert, P. M. 1999 Interactions between  $\text{NH}_4^+$  and  $\text{NO}_3^-$  uptake and assimilation: comparison of diatoms and dinoflagellates at several growth temperatures. *Mar. Biol.* **133**, 541–551.
- Meeson, B. W. & Sweeney, B. M. 1982 Adaptation of *Ceratium furca* and *Gonyaulax polyedra* (Dinophyceae) to different temperatures and irradiances: growth rates and cell volumes. *J. Phycol.* **18**, 241–245.
- Montagnes, D. J. S. & Franklin, D. J. 2001 Effect of temperature on diatom volume, growth rate, and carbon and nitrogen content: reconsidering some paradigms. *Limnol. Oceanogr.* **46**, 2008–2018.
- Montagnes, D. J. S. & Lessard, E. J. 1999 Population dynamics of the marine planktonic ciliate *Strombidinopsis multiauris*: its potential to control phytoplankton blooms. *Aquat. Microb. Ecol.* **20**, 167–181.
- Morris, I. & Glover, H. E. 1974 Questions on the mechanism of temperature adaptation in marine phytoplankton. *Mar. Biol.* **24**, 147–154.
- Mühlig-Hofmann, A. (unpubl.) The effect of temperature on size and growth rate of marine benthic diatoms. B.Sc dissertation, 1999, University of Liverpool.
- Nielsen, M. V. 1996 Growth and chemical composition of the toxic dinoflagellate *Gymnodinium galatheanum* in relation to irradiance, temperature and salinity. *Mar. Ecol. Prog. Ser.* **136**, 205–211.
- Sosik, H. M. & Mitchell, B. G. 1994 Effects of temperature on growth, light absorption, and quantum yield in *Dunaliella tertiolecta* (Chlorophyceae). *J. Phycol.* **30**, 833–840.
- Thompson, P.A., Guo, M., Harrison, P.J. 1992 Effects of variation in temperature. I. On the biochemical composition of eight species of marine phytoplankton. *J. Phycol.* **28**, 481–488.
- Waring, J. (unpubl.) The effect of temperature on the growth rate and cell volume of marine benthic diatoms. B.Sc dissertation, 2000, University of Liverpool.
- Watras, C. J. & Chisholm, S. W. 1982 Regulation of growth in an estuarine clone of *Gonyaulax tamarensis* Lebour: salinity-dependent temperature responses. *J. Exp. Mar. Biol. Ecol.* **62**, 25–37.
- Weisse, T. & Montagnes, D. J. S. 1998 Effect of temperature on inter- and intraspecific isolates of *Urotricha* (Prostomatida, Ciliophora). *Aquat. Microb. Ecol.* **15**, 285–291.
